# Supplementary material for: Transforming Spent Coffee Grounds’ Hydrolysates with Yeast Lachancea thermotolerans and Lactic Acid Bacterium Lactiplantibacillus plantarum to Develop Potential Novel Alcoholic Beverages
Source: MDPI journal article supplement (doi:10.3390/foods12061161), 2023-03-09
Supplement: s1 [file s1]

## **Supporting information**

**Transforming spent coffee grounds hydrolysates with yeast *Lachancea thermotolerans* and lactic acid bacterium *Lactiplantibacillus plantarum* to develop potential novel alcoholic beverages**

Yunjiao Liu <sup>a</sup>, Yuyun Lu <sup>a\*</sup>, Shao Quan Liu <sup>a,b,\*</sup>

<sup>a</sup> Department of Food Science and Technology, Science Drive 2, Faculty of Science, National University of Singapore, Singapore 117542, Singapore.

<sup>b</sup> National University of Singapore (Suzhou) Research Institute, 377 Lin Quan Street, Suzhou Industrial Park, Jiangsu 215123, China.

## **Corresponding Author**

\* Department of Food Science and Technology, Science Drive 2, National University of Singapore, Singapore 117543, Singapore. Telephone: 65-6516 2687. Fax: 65-6775-7895. E-mail: [fstluy@nus.edu.sg](mailto:fstluy@nus.edu.sg) (Yuyun Lu); [fstlsq@nus.edu.sg](mailto:fstlsq@nus.edu.sg) (Shao Quan Liu)

**Table S1.** Amino acids and ammonia in unfermented and fermented SCG hydrolysates.

| Name<br>(mg/L) | Short<br>Name      | Day 0           | Day 14          |                |                 |                 |                |
|----------------|--------------------|-----------------|-----------------|----------------|-----------------|-----------------|----------------|
|                |                    | UF1             | UF2             | LT             | LP              | LT+Co-LP        | LT+Se-LP       |
| Aspartic acid  | Asp                | 107.10 ± 3.27d  | 105.35 ± 4.40d  | 48.09 ± 0.09ab | 66.12 ± 3.10c   | 52.43 ± 3.10b   | 43.28 ± 0.71a  |
| Threonine      | Thr                | 35.69 ± 1.16c   | 39.08 ± 0.84d   | 20.93 ± 1.33b  | 11.62 ± 0.07a   | 12.00 ± 0.07a   | 19.78 ± 0.15b  |
| Serine         | Ser                | 36.95 ± 2.69d   | 37.33 ± 1.55d   | 32.89 ± 0.76c  | 7.71 ± 0.81a    | 12.05 ± 0.81b   | 33.49 ± 0.10cd |
| Glutamic acid  | Glu                | 215.06 ± 5.96e  | 220.25 ± 4.68e  | 100.62 ± 1.44c | 38.34 ± 3.90a   | 62.29 ± 3.90b   | 131.27 ± 1.35d |
| Proline        | Pro                | 60.90 ± 2.36d   | 62.82 ± 1.37d   | 25.17 ± 0.97a  | 43.81 ± 1.78b   | 45.17 ± 1.78b   | 50.90 ± 2.28c  |
| Glycine        | Gly                | 37.52 ± 0.75d   | 36.02 ± 1.30d   | 31.41 ± 1.71c  | 4.60 ± 0.12a    | 6.44 ± 0.12a    | 22.91 ± 0.58b  |
| Alanine        | Ala                | 93.27 ± 3.59d   | 92.07 ± 1.64d   | 24.45 ± 3.13b  | 6.91 ± 0.18a    | 13.48 ± 0.18a   | 46.83 ± 1.85c  |
| Cystine        | (Cys) <sup>2</sup> | 36.55 ± 2.74d   | 36.46 ± 0.83d   | 23.48 ± 1.32b  | 12.42 ± 0.25a   | 21.42 ± 0.25b   | 30.50 ± 2.30c  |
| Valine         | Val                | 41.85 ± 4.13c   | 40.37 ± 1.73c   | 21.42 ± 0.53b  | 11.84 ± 0.60a   | 11.13 ± 0.60a   | 46.41 ± 0.84c  |
| Methionine     | Met                | 25.19 ± 0.63e   | 24.92 ± 1.45e   | 6.50 ± 0.46a   | 11.18 ± 0.54b   | 14.79 ± 0.54c   | 22.14 ± 1.13d  |
| Isoleucine     | Ile                | 50.24 ± 1.49c   | 50.64 ± 2.31c   | 24.08 ± 1.41b  | 5.06 ± 0.52a    | 5.34 ± 0.52a    | 6.31 ± 0.41a   |
| Leucine        | Leu                | 121.05 ± 1.12c  | 119.85 ± 1.75c  | 47.94 ± 1.13c  | 31.24 ± 0.71a   | 30.25 ± 0.71a   | 41.83 ± 0.65b  |
| Tyrosine       | Tyr                | 51.36 ± 1.87c   | 48.62 ± 1.37c   | 41.81 ± 1.37b  | 43.59 ± 0.98b   | 36.07 ± 0.98a   | 35.75 ± 0.76a  |
| Phenylalanine  | Phe                | 95.05 ± 4.99b   | 96.47 ± 2.50b   | 19.61 ± 0.59a  | 13.74 ± 0.15a   | 13.74 ± 0.15a   | 17.52 ± 0.43a  |
| Histidine      | His                | 28.12 ± 0.48c   | 25.50 ± 1.94c   | 18.17 ± 0.96b  | 13.97 ± 0.52a   | 13.08 ± 0.52a   | 11.16 ± 0.44a  |
| Lysine         | Lys                | 68.95 ± 2.84e   | 63.74 ± 2.87d   | 11.32 ± 0.68a  | 19.90 ± 1.19bc  | 18.16 ± 1.19b   | 23.88 ± 0.87c  |
| ammonium       | NH <sub>4</sub>    | 32.02 ± 1.92b   | 30.83 ± 0.58b   | 6.69 ± 0.39a   | 6.15 ± 0.42a    | 6.01 ± 0.42a    | 6.13 ± 0.18a   |
| Arginine       | Arg                | 58.65 ± 1.88c   | 60.39 ± 2.21c   | 6.16 ± 0.33a   | 13.90 ± 0.44b   | 5.86 ± 0.44a    | 3.16 ± 0.96a   |
| Σ AA           |                    | 1195.53 ± 4.92d | 1190.73 ± 1.25d | 510.76 ± 4.25b | 362.11 ± 10.39a | 379.80 ± 10.13a | 593.24 ± 8.34c |
| ΣYAN (N mg/L)  |                    | 154.51 ± 1.93d  | 152.53 ± 0.64d  | 59.66 ± 0.68b  | 39.35 ± 1.23a   | 41.08 ± 0.90a   | 66.88 ± 0.57c  |

Notes: UF1 and UF2: Unfermented SCG hydrolysates at day 0 and day 14; LT: *L. thermotolerans* Concerto, LP: *L. plantarum* ML Prime, LT+Co-LP: simultaneous inoculation of *L. thermotolerans* Concerto and *L. plantarum* ML Prime; LT+Se-LP: *L. thermotolerans* Concerto with sequentially inoculated *L. plantarum* ML Prime at day 4. a, b, c, d, e: Statistical analysis using ANOVA (n=3) at 95% confidence interval. Same letters indicate no significant difference between samples.

**Table S2.** Changes in volatile compounds of SCG hydrolysates before and after fermentation.

| Compound (μg/L)                  | Identification methods | LRI  | Day 0           | Day 14         |               |               |                 |                 |
|----------------------------------|------------------------|------|-----------------|----------------|---------------|---------------|-----------------|-----------------|
|                                  |                        |      | UF1             | UF2            | LT            | LP            | LT+Co-LP        | LT+Se-LP        |
| Acids                            |                        |      |                 |                |               |               |                 |                 |
| α-Pyrone-6-carboxylic acid       | MS, LRI                | 1365 | 0.00 ± 0.00a    | 0.00 ± 0.00a   | 26.06 ± 4.5e  | 9.54 ± 0.1d   | 1.65 ± 0.01b    | 5.66 ± 1.27c    |
| Propanoic acid                   | MS, LRI                | 1534 | 7.77 ± 1.75c    | 7.72 ± 0.26c   | 0.46 ± 0.06a  | 1.79 ± 0.25b  | 1.17 ± 0.29b    | 0.11 ± 0.01a    |
| Butanoic acid                    | MS, LRI                | 1623 | 8.3 ± 2.11c     | 8.25 ± 0.40c   | 0.00 ± 0.00a  | 0.00 ± 0.00a  | 2.11 ± 0.4b     | 0.00 ± 0.00a    |
| 2-Propenoic acid                 | MS, LRI                | 1635 | 0.98 ± 0.14c    | 0.99 ± 0.08c   | 0.18 ± 0.00b  | 0.00 ± 0.00a  | 0.00 ± 0.00a    | 0.00 ± 0.00a    |
| Pentanoic acid                   | MS, LRI                | 1647 | 5.14 ± 0.05b    | 5.24 ± 0.18b   | 0.86 ± 0.14a  | 0.95 ± 0.07a  | 0.98 ± 0.10a    | 0.93 ± 0.12a    |
| 3-Methylbutanoic acid            | MS, LRI                | 1664 | 26.08 ± 3.03c   | 24.85 ± 2.76c  | 1.98 ± 0.32ab | 6.78 ± 1.00b  | 6.65 ± 0.76ab   | 1.91 ± 0.24a    |
| 2-Butenoic acid                  | MS, LRI                | 1774 | 29.03 ± 1.22c   | 30.01 ± 0.58c  | 0.46 ± 0.08b  | 0.42 ± 0.08b  | 0.24 ± 0.04a    | 0.15 ± 0.03a    |
| Hexanoic acid                    | MS, LRI                | 1840 | 5.73 ± 1.02cd   | 5.76 ± 1.08cd  | 2.03 ± 0.4a   | 7.78 ± 0.97d  | 4.48 ± 0.8bc    | 3.25 ± 0.31ab   |
| Octanoic acid                    | MS, LRI                | 2033 | 0.20 ± 0.01b    | 0.17 ± 0.02b   | 0.00 ± 0.00a  | 3.30 ± 0.24c  | 0.00 ± 0.00a    | 0.00 ± 0.00a    |
| Nonanoic acid                    | MS, LRI                | 2144 | 0.57 ± 0.02b    | 0.50 ± 0.05b   | 0.28 ± 0.05a  | 0.46 ± 0.08b  | 0.48 ± 0.07b    | 0.43 ± 0.05b    |
| n-Decanoic acid                  | MS, LRI                | 2266 | 0.00 ± 0.00a    | 0.00 ± 0.00a   | 0.67 ± 0.07b  | 0.65 ± 0.11b  | 1.32 ± 0.22c    | 1.25 ± 0.25c    |
| Benzoic acid                     | MS, LRI                | 2442 | 3.34 ± 0.20c    | 3.37 ± 0.34c   | 1.20 ± 0.38b  | 0.51 ± 0.63a  | 0.62 ± 0.11a    | 0.26 ± 0.22a    |
| Alcohols                         |                        |      |                 |                |               |               |                 |                 |
| 3-Buten-2-ol                     | MS, LRI                | 1125 | 1.78 ± 0.28a    | 1.8 ± 0.27a    | 4.06 ± 0.52b  | 1.22 ± 0.06a  | 1.18 ± 0.06a    | 1.18 ± 0.2a     |
| 1-Pentanol                       | MS, LRI                | 1202 | 1.42 ± 0.16b    | 1.39 ± 0.15b   | 53.24 ± 6.03d | 0.00 ± 0.00a  | 10.5 ± 2.12c    | 12.35 ± 1.53c   |
| 1-Hexen-3-ol                     | MS, LRI                | 1247 | 0.00 ± 0.00a    | 0.00 ± 0.00a   | 0.20 ± 0.01b  | 0.00 ± 0.00a  | 0.29 ± 0.09b    | 0.00 ± 0.00a    |
| 2-Heptanol                       | MS, LRI                | 1316 | 9.27 ± 0.51bc   | 9.32 ± 0.61bc  | 10.7 ± 1.80c  | 6.18 ± 0.02a  | 6.72 ± 0.01a    | 7.86 ± 1.05ab   |
| 3-Furylmethanol                  | MS, LRI                | 1671 | 0.87 ± 0.00a    | 0.62 ± 0.13a   | 3.84 ± 0.53b  | 2.55 ± 0.32b  | 8.01 ± 1.23c    | 3.4 ± 0.12b     |
| Benzyl alcohol                   | MS, LRI                | 1897 | 2.44 ± 0.25b    | 2.30 ± 0.17b   | 3.57 ± 0.06c  | 0.82 ± 0.10a  | 3.40 ± 0.08c    | 3.52 ± 0.15c    |
| 2-Phenylethyl alcohol            | MS, LRI                | 1940 | 0.00 ± 0.00a    | 0.00 ± 0.00a   | 158.6 ± 5.04d | 18.29 ± 0.66b | 175.9 ± 6.60e   | 104.81 ± 1.30c  |
| 2-Ethyl-2-heptanol               | MS, LRI                | 2135 | 0.00 ± 0.00a    | 0.00 ± 0.00a   | 2.05 ± 0.38b  | 6.67 ± 0.81d  | 3.87 ± 0.75c    | 3.27 ± 0.48bc   |
| Aldehydes                        |                        |      |                 |                |               |               |                 |                 |
| 3-Methyl pentanal                | MS, LRI                | 1080 | 5.82 ± 0.77b    | 5.82 ± 0.77b   | 3.14 ± 0.54a  | 1.95 ± 0.19a  | 2.62 ± 0.31a    | 2.52 ± 0.20a    |
| 2-Hexenal                        | MS, LRI                | 1429 | 0.00 ± 0.00a    | 0.00 ± 0.00a   | 0.13 ± 0.01b  | 0.17 ± 0.01b  | 0.51 ± 0.08c    | 2.97 ± 0.46d    |
| Furfural                         | MS, LRI                | 1473 | 1.44 ± 0.1a     | 1.34 ± 0.05a   | 12.58 ± 0.38b | 15.32 ± 0.77c | 33.22 ± 1.05e   | 19.21 ± 2.02d   |
| Benzaldehyde                     | MS, LRI                | 1533 | 118.28 ± 3.65e  | 118.02 ± 3.48e | 23.87 ± 0.31a | 62.01 ± 0.08c | 82.22 ± 0.44c   | 41.57 ± 0.11b   |
| 5-Methylfurfural                 | MS, LRI                | 1593 | 10.76 ± 1.52c   | 10.03 ± 1.05c  | 0.42 ± 0.02a  | 11.21 ± 1.06c | 0.58 ± 0.01a    | 6.13 ± 0.20b    |
| Benzeneacetaldehyde              | MS, LRI                | 1654 | 4.85 ± 0.29d    | 4.84 ± 0.40d   | 3.31 ± 0.72c  | 0.46 ± 0.00b  | 0.20 ± 0.00a    | 0.21 ± 0.05a    |
| 2,5-Dimethylbenzaldehyde         | MS, LRI                | 1830 | 1.27 ± 0.17a    | 1.21 ± 0.21a   | 1.54 ± 0.21a  | 4.89 ± 0.14b  | 1.63 ± 0.25a    | 1.28 ± 0.18a    |
| 1-Methylpyrrole-2-carboxaldehyde | MS, LRI                | 2119 | 0.40 ± 0.07a    | 0.45 ± 0.11a   | 0.35 ± 0.04a  | 0.49 ± 0.11a  | 0.38 ± 0.05a    | 0.29 ± 0.04a    |
| Esters                           |                        |      |                 |                |               |               |                 |                 |
| Ethyl acetate                    | MS, LRI                | /    | 0.00 ± 0.00a    | 0.00 ± 0.00a   | 88.6 ± 0.67c  | 5.65 ± 0.40b  | 227.59 ± 11.43e | 98.47 ± 0.05d   |
| Vinyl acetate                    | MS, LRI                | 1021 | 12.18 ± 2.44abc | 11.04 ± 1.1bc  | 11.11 ± 0.18a | 8.32 ± 1.34b  | 12.75 ± 1.71cd  | 15.21 ± 0.49d   |
| cis-3-Hexenyl phenylacetate      | MS, LRI                | 1158 | 0.00 ± 0.00a    | 0.00 ± 0.00a   | 0.09 ± 0.00a  | 0.38 ± 0.05b  | 3.77 ± 0.53c    | 0.22 ± 0.00b    |
| Ethyl hexanoate                  | MS, LRI                | 1216 | 0.00 ± 0.00a    | 0.00 ± 0.00a   | 5.04 ± 0.45d  | 0.00 ± 0.00a  | 0.74 ± 0.1b     | 2.64 ± 0.53c    |
| Ethyl hexenoate                  | MS, LRI                | 1296 | 0.00 ± 0.00a    | 0.00 ± 0.00a   | 5.21 ± 0.60e  | 0.14 ± 0.01b  | 1.78 ± 0.16c    | 4.18 ± 0.45d    |
| Methyl acetate                   | MS, LRI                | 1309 | 0.00 ± 0.00a    | 0.00 ± 0.00a   | 0.00 ± 0.00a  | 10.69 ± 2.18d | 5.14 ± 0.98c    | 1.66 ± 0.05b    |
| Ethyl heptanoate                 | MS, LRI                | 1319 | 0.00 ± 0.00a    | 0.00 ± 0.00a   | 0.39 ± 0.08b  | 1.05 ± 0.00c  | 4.55 ± 0.58e    | 2.65 ± 0.33d    |
| Isopropyl lactate                | MS, LRI                | 1324 | 0.00 ± 0.00a    | 0.00 ± 0.00a   | 0.39 ± 0.08b  | 1.05 ± 0.00c  | 3.13 ± 0.16e    | 2.65 ± 0.33d    |
| Ethyl sorbate                    | MS, LRI                | 1506 | 0.00 ± 0.00a    | 0.00 ± 0.00a   | 4.07 ± 0.62d  | 0.30 ± 0.02b  | 0.09 ± 0.00b    | 1.14 ± 0.14c    |
| Ethyl 4-hydroxyphenylacetate     | MS, LRI                | 1515 | 0.00 ± 0.00a    | 0.00 ± 0.00a   | 0.92 ± 0.04b  | 1.19 ± 0.00b  | 2.56 ± 0.18d    | 1.89 ± 0.16c    |
| Ethyl nonanoate                  | MS, LRI                | 1525 | 0.00 ± 0.00a    | 0.00 ± 0.00a   | 5.14 ± 0.00d  | 0.35 ± 0.07b  | 1.31 ± 0.27c    | 0.48 ± 0.02b    |
| Furfuryl acetate                 | MS, LRI                | 1537 | 0.00 ± 0.00a    | 0.00 ± 0.00a   | 0.00 ± 0.00a  | 0.00 ± 0.00a  | 0.44 ± 0.00c    | 0.26 ± 0.03b    |
| Methyl 2-furoate                 | MS, LRI                | 1583 | 0.00 ± 0.00a    | 0.00 ± 0.00a   | 2.69 ± 0.45c  | 2.45 ± 0.45c  | 2.78 ± 0.48c    | 0.76 ± 0.04b    |
| Ethyl decanoate                  | MS, LRI                | 1631 | 0.00 ± 0.00a    | 0.00 ± 0.00a   | 18.77 ± 2.11c | 6.5 ± 0.77b   | 5.72 ± 0.82b    | 21.15 ± 2.19c   |
| Ethyl (Z)-4-decenoate            | MS, LRI                | 1657 | 0.00 ± 0.00a    | 0.00 ± 0.00a   | 11.98 ± 1.61e | 0.55 ± 0.05b  | 7.68 ± 0.93d    | 3.95 ± 0.65c    |
| Isopropyl acetate                | MS, LRI                | 1787 | 0.00 ± 0.00a    | 0.00 ± 0.00a   | 1.41 ± 0.21c  | 0.54 ± 0.04b  | 1.35 ± 0.32c    | 0.75 ± 0.11b    |
| 2-Phenylethyl acetate            | MS, LRI                | 1821 | 0.00 ± 0.00a    | 0.00 ± 0.00a   | 2.66 ± 0.10c  | 0.58 ± 0.11b  | 3.28 ± 0.37d    | 2.35 ± 0.48c    |
| Furans                           |                        |      |                 |                |               |               |                 |                 |
| 2,5-Dimethylfuran                | MS, LRI                | 1014 | 20.51 ± 2.95c   | 20.37 ± 0.86c  | 6.6 ± 0.52b   | 0.00 ± 0.00a  | 0.00 ± 0.00a    | 5.24 ± 0.44b    |
| 2-Pentylfuran                    | MS, LRI                | 1210 | 1.46 ± 0.04ab   | 1.44 ± 0.10ab  | 2.29 ± 0.42c  | 1.41 ± 0.30ab | 2.19 ± 0.43bc   | 1.05 ± 0.15a    |
| 2-Acetylfuran                    | MS, LRI                | 1512 | 10.84 ± 1.07c   | 10.94 ± 1.49c  | 3.10 ± 0.51a  | 8.60 ± 0.95c  | 3.81 ± 0.73a    | 5.42 ± 0.04b    |
| 2-Acetyl-5-methylfuran           | MS, LRI                | 1624 | 2.21 ± 0.19c    | 2.28 ± 0.09c   | 1.13 ± 0.14b  | 0.48 ± 0.06a  | 2.02 ± 0.15c    | 0.92 ± 0.09b    |
| 2-Vinylfuran                     | MS, LRI                | 1869 | 0.72 ± 0.14ab   | 0.77 ± 0.18ab  | 0.63 ± 0.11b  | 1.02 ± 0.14a  | 0.63 ± 0.11b    | 0.50 ± 0.02b    |
| Ketones                          |                        |      |                 |                |               |               |                 |                 |
| 2,3-Pentanedione                 | MS, LRI                | 1056 | 9.52 ± 1.07b    | 8.77 ± 0.19b   | 0.00 ± 0.00a  | 0.00 ± 0.00a  | 0.00 ± 0.00a    | 0.00 ± 0.00a    |
| 2-Heptanone                      | MS, LRI                | 1193 | 0.55 ± 0.02a    | 0.55 ± 0.01a   | 1.57 ± 0.06b  | 5.74 ± 0.78d  | 5.16 ± 0.33d    | 2.88 ± 0.33c    |
| 3-Octanone                       | MS, LRI                | 1247 | 0.00 ± 0.00a    | 0.00 ± 0.00a   | 0.18 ± 0.03b  | 0.17 ± 0.03b  | 0.31 ± 0.03c    | 0.14 ± 0.00b    |
| Heptenone                        | MS, LRI                | 1238 | 0.57 ± 0.11ab   | 0.59 ± 0.02ab  | 0.93 ± 0.06bc | 0.19 ± 0.01a  | 2.62 ± 0.58d    | 1.38 ± 0.20c    |
| Acetoin                          | MS, LRI                | 1292 | 0.00 ± 0.00a    | 0.00 ± 0.00a   | 0.72 ± 0.06b  | 75.68 ± 1.63d | 32.02 ± 4.74c   | 108.05 ± 14.99e |
| Pyrazines & pyrroles             |                        |      |                 |                |               |               |                 |                 |
| 2,6-Dimethyl pyrazine            | MS, LRI                | 1351 | 5.48 ± 0.73c    | 5.61 ± 0.82c   | 3.01 ± 0.42b  | 1.60 ± 0.12a  | 39.36 ± 7.89d   | 37.11 ± 3.2d    |
| 2,6-Methylethylpyrazine          | MS, LRI                | 1385 | 0.79 ± 0.08c    | 0.86 ± 0.07c   | 0.69 ± 0.03c  | 0.41 ± 0.13ab | 0.48 ± 0.01b    | 0.24 ± 0.03a    |

|                              |         |      |                |                |               |                 |                  |                 |
|------------------------------|---------|------|----------------|----------------|---------------|-----------------|------------------|-----------------|
| Pyridazine                   | MS, LRI | 1440 | 0.00 ± 0.00a   | 0.00 ± 0.00a   | 0.93 ± 0.61c  | 5.39 ± 0.00d    | 0.41 ± 0.01b     | 0.54 ± 0.02b    |
| 2-Vinylpyrazine              | MS, LRI | 1443 | 0.61 ± 0.00a   | 0.61 ± 0.06a   | 1.25 ± 0.07b  | 0.46 ± 0.06a    | 1.14 ± 0.13b     | 0.55 ± 0.01a    |
| Pyridine                     | MS, LRI | 1501 | 1.57 ± 0.25b   | 1.58 ± 0.22b   | 3.10 ± 0.00d  | 3.34 ± 0.08d    | 2.4 ± 0.25c      | 0.87 ± 0.13a    |
| 2-Acetylpyrrole              | MS, LRI | 1982 | 12.71 ± 0.55cd | 12.22 ± 1.00cd | 8.57 ± 0.25a  | 10.49 ± 0.55b   | 10.56 ± 0.29bc   | 11.05 ± 0.66bc  |
| <b>Terpenoids</b>            |         |      |                |                |               |                 |                  |                 |
| <i>trans</i> -Linalool oxide | MS, LRI | 1438 | 15.85 ± 2.79c  | 17.44 ± 4.81c  | 0.48 ± 0.09a  | 27.82 ± 0.89d   | 19.72 ± 2.61c    | 7.56 ± 0.5b     |
| Linalool                     | MS, LRI | 1539 | 0.00 ± 0.00a   | 0.00 ± 0.00a   | 0.00 ± 0.00a  | 4.96 ± 0.43c    | 4.36 ± 0.74c     | 2.28 ± 0.31b    |
| <i>cis</i> -Geraniol         | MS, LRI | 1857 | 0.00 ± 0.00a   | 0.00 ± 0.00a   | 0.00 ± 0.00a  | 2.80 ± 0.54c    | 1.43 ± 0.14b     | 1.18 ± 0.23b    |
| <i>α</i> -Terpineol          | MS, LRI | 1661 | 0.23 ± 0.04a   | 0.21 ± 0.02a   | 0.20 ± 0.01a  | 0.35 ± 0.02b    | 0.33 ± 0.07b     | 0.28 ± 0.00a    |
| <b>Volatile phenols</b>      |         |      |                |                |               |                 |                  |                 |
| <i>m</i> -Cresol             | MS, LRI | 1143 | 0.45 ± 0.01a   | 0.46 ± 0.01a   | 4.03 ± 0.56c  | 2.70 ± 0.42b    | 6.07 ± 0.34d     | 7.95 ± 0.61e    |
| Phenol                       | MS, LRI | 2012 | 1.68 ± 0.16d   | 1.57 ± 0.43cd  | 0.97 ± 0.15ab | 1.50 ± 0.25bcd  | 0.89 ± 0.03ab    | 0.84 ± 0.09a    |
| Ethylguaiaicol               | MS, LRI | 2038 | 0.81 ± 0.08a   | 0.85 ± 0.13a   | 1.59 ± 0.11b  | 37.73 ± 2.37d   | 35.56 ± 2.28d    | 9.27 ± 0.71c    |
| 4-Diacetylaminophenol        | MS, LRI | 2084 | 0.00 ± 0.00a   | 0.00 ± 0.00a   | 0.00 ± 0.00a  | 0.47 ± 0.05b    | 0.1 ± 0.00c      | 0.00 ± 0.00a    |
| <i>p</i> -Cresol             | MS, LRI | 2095 | 2.30 ± 0.09b   | 2.23 ± 0.11b   | 0.20 ± 0.03a  | 0.13 ± 0.02a    | 0.16 ± 0.03a     | 0.15 ± 0.02a    |
| 4-Ethylphenol                | MS, LRI | 2081 | 0.00 ± 0.00a   | 0.00 ± 0.00a   | 6.83 ± 0.89b  | 206.65 ± 41.09e | 163.31 ± 11.53cd | 155.07 ± 15.95c |
| 2,4-Di-tert-butylphenol      | MS, LRI | 2305 | 0.00 ± 0.00a   | 0.00 ± 0.00a   | 2.61 ± 0.56c  | 2.78 ± 0.48c    | 1.48 ± 0.19b     | 2.28 ± 0.19bc   |

Note: UF1 and UF2: Unfermented SCG hydrolysates at day 0 and day14; LT: mono-inoculation of *L. thermotolerans* Concerto, LP: mono-inoculation of *L. plantarum* ML Prime, LT+Co-LP: co-inoculation of *L. thermotolerans* Concerto and *L. plantarum* ML Prime; LT+Se-LP: sequential inoculation of *L. thermotolerans* Concerto and *L. plantarum* ML Prime at day 4. LRI: linear retention index; determined on a DB-FFAF column relative to C7-C40 hydrocarbons. ANOVA statistical analysis of mean values (n=3) with different letters (a-e) at  $p < 0.05$ .

**Table S3.** Compound names related to numbers used in PCA analysis.

| Number | Compound                           | Number | Compound                            | Number | Compound                         |
|--------|------------------------------------|--------|-------------------------------------|--------|----------------------------------|
| 1      | $\alpha$ -Pyrone-6-carboxylic acid | 26     | Benzaldehyde                        | 51     | 2-Vinylfuran                     |
| 2      | Propanoic acid                     | 27     | 5-Methylfurfural                    | 52     | 2,3-Pentanedione                 |
| 3      | Butanoic acid                      | 28     | Benzeneacetaldehyde                 | 53     | 2-Heptanone                      |
| 4      | 2-Propenoic acid                   | 29     | 2,5-Dimethylbenzaldehyde            | 54     | 3-Octanone                       |
| 5      | Pentanoic acid                     | 30     | 1-Methylpyrrole-2-carboxaldehyde    | 55     | Heptenone                        |
| 6      | 3-Methylbutanoic acid              | 31     | Ethyl acetate                       | 56     | Acetoin                          |
| 7      | 2-Butenoic acid                    | 32     | Vinyl acetate                       | 57     | Methyl 3-furoate                 |
| 8      | Hexenoic acid                      | 33     | <i>cis</i> -3-Hexenyl phenylacetate | 58     | 2,6-Dimethyl pyrazine            |
| 9      | Octanoic acid                      | 34     | Ethyl hexanoate                     | 59     | 2,6-Methylethylpyrazine          |
| 10     | Nonanoic acid                      | 35     | Ethyl hexenoate                     | 60     | Pyridazine                       |
| 11     | n-Decanoic acid                    | 36     | Methyl acetate                      | 61     | 2-Vinylpyrazine                  |
| 12     | Benzoic acid                       | 37     | Ethyl heptanoate                    | 62     | Pyridine                         |
| 13     | 3-Buten-2-ol                       | 38     | Isopropyl L-lactate                 | 63     | 2-Acetylpyrrole                  |
| 14     | 1-Pentanol                         | 39     | Ethyl sorbate                       | 64     | Linalool                         |
| 15     | 1-Hexen-3-ol                       | 40     | Ethyl 4-hydroxyphenylacetate        | 65     | <i>\alpha</i> -Terpineol         |
| 16     | 2-Heptanol                         | 41     | Ethyl nonanoate                     | 66     | <i>m</i> -Cresol                 |
| 17     | 3-Furylmethanol                    | 42     | Furfuryl acetate                    | 67     | Phenol                           |
| 18     | <i>cis</i> -Geraniol               | 43     | Ethyl decanoate                     | 68     | <i>p</i> -Ethylguaiaicol         |
| 19     | Benzyl alcohol                     | 44     | Ethyl (Z)-4-decenoate               | 69     | 4-Diacetylamino-phenol           |
| 20     | 2-Phenylethyl alcohol              | 45     | Isopropyl acetate                   | 70     | <i>p</i> -Cresol                 |
| 21     | 2-Ethyl-2-heptanol                 | 46     | 2-Phenethyl acetate                 | 71     | 4-Ethylphenol                    |
| 22     | 3-Methyl pentanal                  | 47     | 2,5-Dimethylfuran                   | 72     | 2,4-Di- <i>tert</i> -butylphenol |
| 23     | 2-Hexenal                          | 48     | 2-Pentylfuran                       | 73     | Acetic acid                      |
| 24     | <i>trans</i> -Linalool oxide       | 49     | 2-Acetylfuran                       | 74     | Ethanol                          |
| 25     | Furfural                           | 50     | 2-Acetyl-5-methylfuran              |        |                                  |
